# Supplementary material
Source: Elsevier journal article supplement (https://70711.xbv1n.group/papers/mmc1.pdf)
Supplement: mmc1 [file mmc1.pdf]

**Table S1. Parameters of the Mathematical Model and Range Used for the Systematic Parameter Scan, Related to Figure 4 and Figure S4**

| Dimensionless parameter | Functional relation to systems parameter | Scanned parameter range                              |
|-------------------------|------------------------------------------|------------------------------------------------------|
| $b_1$                   | $k_d/k_{dr}$                             | 0.1 - 10 000                                         |
| $b_2$                   | $k_{inA}/k_{dr}$                         | –                                                    |
| $b_3$                   | $k_c k_s/k_{dr}$                         | 0.001 - 100 000                                      |
| $b_4$                   | $\alpha/k_{dr}$                          | 0.000001 - 1                                         |
| $b_5$                   | $k_{exF}/k_{dr}$                         | 0.001 - 10 000                                       |
| $b_6$                   | $k_{inF}/k_{dr}$                         | 0.00001 - 1000                                       |
| $b_7$                   | $\beta/k_{dr}$                           | 0.00001 - 1000                                       |
| $b_8$                   | $\gamma k_s/k_{dr}$                      | 0.00001 - 1                                          |
| $b_9$                   | $k_{inC}/k_{dr}$                         | 0.001 - 100 000                                      |
| $f_0$                   | $F_0 k_{dr}/k_s$                         | 0.0001 - 1                                           |
| $\tilde{k}_1$           | $k_1/k_{dr}$                             | 0.1 - 10 000                                         |
| $\tilde{k}_2$           | $k_2/k_{dr}$                             | given by $\tilde{k}_2 = \tilde{k}_1 \frac{k_2}{k_1}$ |

**Table S2. Modeling Different Genotypes with Appropriate Kinetic Parameters, Related to Figure 6**

|                | Darkness                             | cFR                               |
|----------------|--------------------------------------|-----------------------------------|
| Wild type      | $k_1 = k_2 = b_2 = 0$                | $k_1 \neq 0, k_2 \neq 0, b_2 = 0$ |
| phyA Y242H     | $k_1 \rightarrow \infty, b_2 = 0$    |                                   |
| phyA Y242H-NLS | $k_1 \rightarrow \infty, b_2 \neq 0$ |                                   |

**Table S3. Primers Used in This Study, Related to Experimental Procedures**

|        |                                                                          |
|--------|--------------------------------------------------------------------------|
| ah010: | 5'-TTA CAC CAT CCG GAG GTC AG-3'                                         |
| ah013: | 5'-GGG GTA CCG GAT CCA AAA ATG TCA GGC TCT AGG CCG-3'                    |
| ah093: | 5'-GAA GAT CTA AAA ATG GTG AGC AAG GGC GAG-3'                            |
| ah094: | 5'-GGA CTA GTT ATC TAG AGC CCT AGG ATC CGC CTT GTA CAG CTC GTC CAT G-3'  |
| ah136: | 5'-GAT GCA ATT GAA TCC ATG TTC GCC ATG TAC TGC AAA TGG GCG CTG TGC GG-3' |
| ah212: | 5'-GCT CTA GAA AAA TGC ATC ATT TTG TCC CTG-3'                            |
| ah281: | 5'-CAT GCC ATG GAA CTT GTG AGC CAT CAC CCT GTC ATA-3'                    |
| ah385: | 5'-GGA CTA GTT GCG GCC GCT CCT CCA ACC T-3'                              |
| ah521: | 5'-CCC AAG CTT GGA TCC CGG CTC TAG AAT GGA TAA AGC GGA ATT A-3'          |
| ah522: | 5'-CCC AAG CTT TTA AGC GTA ATC TGG TAC GTC G-3'                          |
| wn4:   | 5'-GGA CTA GTT ACA CGT GCT TGT TTT GT-3'                                 |
